# Supplementary material for: Meiotic Crossover Control by Concerted Action of Rad51-Dmc1 in Homolog Template Bias and Robust Homeostatic Regulation
Source: PLOS journal article supplement (doi:10.1371/journal.pgen.1003978), 2013-12-19
Supplement: S9 (10.1371/journal.pgen.1003978.s009) [file journal.pgen.1003978.s009.pdf › journal.pgen.1003978.s009.pdf]

**Supplemental Table 1.**  
**Quantitation of Red1, Zip1, and Zip3 localization.**

|                                                                                                                                                       | Strain       |                      |                         |                     |
|-------------------------------------------------------------------------------------------------------------------------------------------------------|--------------|----------------------|-------------------------|---------------------|
|                                                                                                                                                       | wild type    | <i>hed1</i>          | <i>dmc1 hed1</i>        | <i>dmc1</i>         |
| Density Red1 on Zip1                                                                                                                                  | 5 +/- 0.5    | 7 +/- 0.7 (0.041)*   | 2 +/- 0.5 (<0.0001)*    | 3 +/- 1.8           |
| Density Red1 overall                                                                                                                                  | 9 +/- 0.6    | 11 +/- 0.6 (0.0001)* | 8 +/- 0.9 (0.05)*       | 9 +/- 4             |
| Density Red1 not associated with Zip1                                                                                                                 | 3 +/- 0.4    | 4 +/- 0.7            | 5 +/- 0.8               | 5 +/- 2             |
| Fraction Red1 on Zip1                                                                                                                                 | 62 +/- 5     | 59 +/- 4 (0.0751)    | 33 +/- 5 (<0.0001)*     | 38 +/- 12           |
| Density Zip1                                                                                                                                          | 11 +/- 1     | 8 +/- 0.6 (<0.0001)* | 5 +/- 0.6 (<0.0001)*    | 7 +/- 4             |
| # Zip1 lines/cell (class 2)                                                                                                                           | 5 +/- 0.7    | 4 +/- 0.7 (0.1)      | 3 +/- .3 (<0.0001)*     | 2 +/- 0.75          |
| # Zip1 lines/cell (all)                                                                                                                               | 6.5 +/- 0.84 | 5.7 +/- 0.71 (0.22)  | 2.9 +/- 0.37 (<0.0001)* | 1.7 +/- 0.75        |
| # Zip3 foci on Zip1 lines                                                                                                                             | 4 +/- 0.2    | 5 +/- 0.3 (0.0025)*  | 3 +/- 0.2 (<0.0001)*    | 3 +/- 0.5           |
| # Zip3 foci                                                                                                                                           | 57 +/- 3     | 64 +/- 2 (<0.0001)*  | 45 +/- 1 (<0.0001)*     | 45 +/- 2 (<0.0001)* |
| All error is the 95% confidence interval. All P values are determined by the Mann-Whitney test. All P values marked with an asterisk are significant. |              |                      |                         |                     |
