# Supplementary material for: Meiotic Crossover Control by Concerted Action of Rad51-Dmc1 in Homolog Template Bias and Robust Homeostatic Regulation
Source: PLOS journal article supplement (doi:10.1371/journal.pgen.1003978), 2013-12-19
Supplement: S11 (10.1371/journal.pgen.1003978.s011) [file journal.pgen.1003978.s011.pdf › journal.pgen.1003978.s011.pdf]

**Supplemental Table 3.**  
**Analysis of crossover interference using non-parental ditype ratios.**

|                      |                   | Interval         |                  |                  |                 |                 |                  |                  |
|----------------------|-------------------|------------------|------------------|------------------|-----------------|-----------------|------------------|------------------|
|                      |                   | <i>CHA1:HIS4</i> | <i>HIS4:LEU2</i> | <i>LEU2:CEN3</i> | <i>CEN3:MAT</i> | <i>MAT:THR4</i> | <i>THR4:CUP1</i> | <i>CUP1:GIT1</i> |
| <b>wild type</b>     | PD:NPD:TT         | 499:6:506        | 721:5:269        | 767:6:242        | 655:4:365       | 643:5:347       | 499:13:474       | 796:3:206        |
|                      | NPD ratio         | 0.11+/-0.05      | 0.44+/-0.20      | 0.69+/-0.29      | 0.18+/-0.09     | 0.25+/-0.11     | 0.29+/-0.08      | 0.49+/-0.29      |
|                      | P value           | <0.0001*         | 0.0739           | 0.3896           | 0.0002*         | 0.0011*         | <0.0001*         | 0.2174           |
| <b>hed1</b>          | PD:NPD:TT         | 259:3:216        | 342:0:130        | 358:2:114        | 280:4:195       | 334:3:132       | 235:2:229        | 389:0:84         |
|                      | NPDobs/exp        | 0.16+/-0.09      | 0                | 0.48+/-0.34      | 0.28+/-0.14     | 0.52+/-0.30     | 0.09+/-0.06      | 0                |
|                      | P value           | 0.0006*          | 0.019            | 0.3139           | 0.0105          | 0.2678          | <0.0001*         | 0.1456           |
| <b>dmc1<br/>hed1</b> | <b>P value WT</b> | 0.6272           | 0.0278           | 0.6394           | 0.5479          | 0.3981          | 0.0455           | 0.0911           |
|                      | PD:NPD:TT         | 617:14:555       | 898:6:273        | 890:7:288        | 767:20:403      | 804:22:359      | 638:25:523       | 926:4:261        |
|                      | NPDobs/exp        | 0.26+/-0.07      | 0.63+/-0.26      | 0.66+/-0.25      | 0.88+/-0.20     | 1.3+/-0.28      | 0.58+/-0.12      | 0.47+/-0.2       |
|                      |                   | P value          | <0.0001*         | 0.2832           | 0.2981          | 0.615           | 0.3323           | 0.0133           |
| <b>P value WT</b>    |                   | 0.0812           | 0.5624           | 0.9375           | 0.0014*         | 0.0005*         | 0.0443           | 0.9547           |

NPD ratios of NPDs observed/NPDs expected in the absence of interference. NPDs expected were calculated using the Papazian equation[75]. P values for interference were calculated by first calculating the fractions of PD<sub>exp</sub>, NPD<sub>exp</sub>, and TT<sub>exp</sub> using the method of Stahl [74]. To determine the numbers of PD<sub>exp</sub>, NPD<sub>exp</sub>, and TT<sub>exp</sub> the fractions expected were multiplied by the total number of tetrads. The numbers of PD<sub>exp</sub>, NPD<sub>exp</sub>, and TT<sub>exp</sub> were then compared to the PD<sub>obs</sub>, NPD<sub>obs</sub>, and TT<sub>obs</sub> using the chi-square goodness of fit test. All values were calculated using the Stahl Laboratory online tool: <http://www.molbio.uoregon.edu/~fstahl/>. PD, parental ditype; NPD, non-parental ditype; TT, tetratype. Non-exchange tetrads were excluded from this analysis. The P value WT rows are a P value for evaluating the difference between the NPD ratios of wild-type and the *hed1* single mutant and wild-type and the *dmc1 hed1* double mutant. The significance was determined by calculating a Z score:  $((\text{Ratio1}-\text{Ratio2})/(\text{sqrt}((\text{SE1}^2)+(\text{SE2}^2))))$  and corresponding P value for each comparison. The P value for significance using the Bonferroni Correction for 7 measurements is 0.007. All P values marked with an asterisk are significant.
