# Supplementary material for: Meiotic Crossover Control by Concerted Action of Rad51-Dmc1 in Homolog Template Bias and Robust Homeostatic Regulation
Source: PLOS journal article supplement (doi:10.1371/journal.pgen.1003978), 2013-12-19
Supplement: S12 (10.1371/journal.pgen.1003978.s012) [file journal.pgen.1003978.s012.pdf › journal.pgen.1003978.s012.pdf]

**Supplemental Table 4.**  
**Analysis of crossover interference between adjacent intervals**

|                  |              |                    | Reference Interval |                  |                  |                  |                 |                 |
|------------------|--------------|--------------------|--------------------|------------------|------------------|------------------|-----------------|-----------------|
|                  | Tetrad Class | Test Interval:     | <i>CHA1:HIS4</i>   | <i>HIS4:LEU2</i> | <i>LEU2:CEN3</i> | <i>HIS4:LEU2</i> | <i>CEN3:MAT</i> | <i>LEU:CEN3</i> |
| wild type        | Adj PD       | PD:NPD:TT          | 265:3:217          | 265:6:448        | 509:6:206        | 509:4:240        | 488:2:268       | 488:2:153       |
|                  |              | cM                 | 24                 | 33               | 17               | 18               | 19              | 13              |
|                  | AdjCO        | PD:NPD:TT          | 454:2:52           | 220:0:54         | 244:0:29         | 212:1:28         | 155:2:91        | 270:4:89        |
|                  |              | cM                 | 6.3                | 9.9              | 5.3              | 7.0              | 21              | 16              |
|                  |              | Ratio map distance | 0.3                | 0.3              | 0.3              | 0.4              | 1.1             | 1.2             |
|                  |              | P value            | <0.0001*           | <0.0001*         | <0.0001*         | <0.0001*         | 0.4656          | 0.2765          |
| <i>hed1</i>      | AdjPD        | PD:NPD:TT          | 148:0:105          | 148:2:192        | 237:2:103        | 237:0:119        | 205:3:149       | 205:1:72        |
|                  |              | cM                 | 20                 | 30               | 16               | 16               | 23              | 14              |
|                  | AdjCO        | PD:NPD:TT          | 194:0:25           | 105:1:24         | 119:0:11         | 105:0:11         | 73:1:42         | 152:1:42        |
|                  |              | cM                 | 5.7                | 12               | 4.2              | 4.7              | 21              | 12              |
|                  |              | Ratio Map distance | 0.3                | 0.4              | 0.3              | 0.3              | 0.9             | 0.9             |
|                  |              | P value            | <0.0001*           | <0.0001*         | <0.0001*         | <0.0001*         | 0.6863          | 0.6461          |
|                  |              | <b>P value WT</b>  | 0.9998             | 0.0172 *         | 0.9999           | 0.9999           | 0.0002*         | <0.0001 *       |
| <i>dmc1 hed1</i> | AdjPD        | PD:NPD:TT          | 440:4:172          | 440:11:451       | 644:7:247        | 644:6:233        | 556:17:315      | 556:5:203       |
|                  |              | cM                 | 16                 | 29               | 16               | 15               | 24              | 15              |
|                  | AdjCO        | PD:NPD:TT          | 462:2:101          | 176:3:100        | 239:0:40         | 254:0:40         | 208:2:83        | 332:2:83        |
|                  |              | cM                 | 10                 | 21               | 7.2              | 6.8              | 16              | 11              |
|                  |              | Ratio Map distance | 0.6                | 0.7              | 0.4              | 0.4              | 0.7             | 0.7             |
|                  |              | P value            | 0.0001*            | 0.0001*          | <0.0001*         | <0.0001*         | 0.0158          | 0.03151         |
|                  |              | <b>P value WT</b>  | <0.0001*           | <0.0001*         | 0.4749           | 0.9999           | 0.0031*         | 0.0354*         |

Crossover interference was measured by the method of Malkova et al. [76]. For each reference interval, tetrads were divided into AdjCO (TTs and NPDs) and AdjPD (PDs). Distributions of tetrad types were then determined for the neighboring intervals and compared using the G test. Map distances were also calculated using the Perkins equation [101] using the Stahl laboratory online tool and expressed as a ratio ( $cM^{AdjCO}/cM^{AdjPD}$ ). A ratio of <1 and P value of  $\leq 0.004$  indicates positive interference between the two intervals based on the Bonferroni Correction for 12 measurements. The ratio of the map distances in the test interval is taken as strength of interference. All P values marked with an asterisk indicate significant differences. All P values marked with an asterisk indicate significant differences. "P value WT" compares the strength of interference in the mutant situation to wild type by bootstrapping the wild-type data to create a new data set in which the sample size is equal to the sample size of the mutant data set. This process was repeated  $10^6$  times and map distance ratios were then determined for each recreated data set. The frequency with which the ratios from the recreated data sets matched the ratio obtained from the mutant data set was then determined. The P value is corrected for multiple testing. Non-exchange tetrads were excluded from this analysis.

**Supplemental Table 4. Continued.**  
**Analysis of crossover interference between adjacent intervals**

|                  |              |                    | Reference Interval |                 |                  |                  |                  |                  |
|------------------|--------------|--------------------|--------------------|-----------------|------------------|------------------|------------------|------------------|
|                  |              |                    | <i>CEN3:MAT</i>    | <i>MAT:THR4</i> | <i>THR4:CUP1</i> | <i>CUP1:GIT1</i> | <i>THR4:CUP1</i> | <i>CUP1:GIT1</i> |
| wild type        | Tetrad Class | Test Interval:     | <i>MAT:THR4</i>    | <i>CEN3:MAT</i> | <i>THR4:CUP1</i> | <i>MAT:THR4</i>  | <i>CUP1:GIT1</i> | <i>THR4:CUP1</i> |
|                  |              | PD:NPD:TT          | 347:3:282          | 347:3:292       | 260:10:364       | 260:5:232        | 349:2:144        | 349:12:412       |
|                  | AdjPD        | cM                 | 24                 | 24              | 33               | 26               | 16               | 31               |
|                  |              | PD:NPD:TT          | 297:2:65           | 285:1:66        | 237:3:103        | 374:0:106        | 424:1:56         | 146:1:56         |
|                  | AdjCO        | cM                 | 11                 | 10              | 18               | 11               | 6.4              | 15               |
|                  |              | Ratio map distance | 0.4                | 0.4             | 0.5              | 0.4              | 0.4              | 0.5              |
| <i>hed1</i>      | AdjPD        | P value            | <0.0001*           | <0.0001*        | <0.0001*         | <0.0001*         | <0.0001*         | <0.0001*         |
|                  |              | PD:NPD:TT          | 180:2:99           | 180:4:159       | 141:2:198        | 141:3:99         | 178:0:66         | 178:2:209        |
|                  | AdjCO        | cM                 | 20                 | 27              | 32               | 24               | 14               | 29               |
|                  |              | PD:NPD:TT          | 163:1:33           | 101:0:34        | 102:0:31         | 200:0:31         | 211:0:17         | 66:0:17          |
|                  | AdjCO        | cM                 | 9.9                | 13              | 12               | 6.7              | 3.7              | 10               |
|                  |              | Ratio map distance | 0.5                | 0.5             | 0.4              | 0.3              | 0.3              | 0.4              |
| <i>dmc1 hed1</i> | AdjPD        | P value            | <0.0001*           | <0.0001*        | <0.0001*         | <0.0001*         | <0.0001*         | <0.0001*         |
|                  |              | <b>P value WT</b>  | 0.9999             | 0.9999          | 0.0249*          | <0.0001*         | 0.0178*          | 0.0473           |
|                  | AdjCO        | PD:NPD:TT          | 496:14:259         | 496:13:304      | 394:17:394       | 394:17:227       | 457:3:179        | 457:17:446       |
|                  |              | cM                 | 22                 | 24              | 31               | 26               | 15               | 30               |
|                  | AdjCO        | PD:NPD:TT          | 310:8:96           | 270:7:95        | 245:8:125        | 411:5:128        | 463:1:81         | 182:8:74         |
|                  |              | cM                 | 17                 | 18              | 23               | 15               | 8.0              | 23               |
| <i>dmc1 hed1</i> | AdjCO        | Ratio map distance | 0.8                | 0.8             | 0.7              | 0.6              | 0.5              | 0.8              |
|                  |              | P value            | 0.0007*            | 0.0003*         | <0.0001*         | <0.0001*         | <0.0001*         | <0.0001*         |
|                  | AdjCO        | <b>P value WT</b>  | 0.0022*            | <0.0001*        | 0.0425*          | 0.0555           | 0.8137           | 0.0158*          |
