# Supplementary material for: Meiotic Crossover Control by Concerted Action of Rad51-Dmc1 in Homolog Template Bias and Robust Homeostatic Regulation
Source: PLOS journal article supplement (doi:10.1371/journal.pgen.1003978), 2013-12-19
Supplement: S13 (10.1371/journal.pgen.1003978.s013) [file journal.pgen.1003978.s013.pdf › journal.pgen.1003978.s013.pdf]

**Supplemental Table 5.**  
**Analysis of coincident crossovers involving distant intervals**

|                                                     |              |                               | Reference Interval                   |                                      |                                      |                                      |
|-----------------------------------------------------|--------------|-------------------------------|--------------------------------------|--------------------------------------|--------------------------------------|--------------------------------------|
|                                                     | Tetrad Class | Test Interval:                | <i>CHA1:HIS4</i><br><i>CUP1:GIT1</i> | <i>CUP1:GIT1</i><br><i>CHA1:HIS4</i> | <i>HIS4:LEU2</i><br><i>THR4:CUP1</i> | <i>THR4:CUP1</i><br><i>HIS4:LEU2</i> |
| WT                                                  | Adj PD       | PD:NPD:TT                     | 401:1:92                             | 401:4:383                            | 359:11:324                           | 359:5:121                            |
|                                                     |              | cM                            | 9.92                                 | 25.82                                | 28.1                                 | 15.57                                |
|                                                     | AdjCO        | PD:NPD:TT                     | 387:2:109                            | 93:2:109                             | 126:2:134                            | 335:0:136                            |
|                                                     |              | cM                            | 12.15                                | 29.66                                | 27.86                                | 14.44                                |
|                                                     |              | Ratio map distance<br>P value | 1.2<br>0.3941                        | 1.1<br>0.2551                        | 1.0<br>0.3827                        | 0.9<br>0.03289                       |
| <i>dmc1 hed1</i><br>(all tetrads included)          | Adj PD       | PD:NPD:TT                     | 695:3:129                            | 695:10:427                           | 696:17:392                           | 696:4:148                            |
|                                                     |              | cM                            | 8.89                                 | 21.51                                | 22.35                                | 10.14                                |
|                                                     | AdjCO        | PD:NPD:TT                     | 437:1:129                            | 132:4:126                            | 152:8:118                            | 409:2:124                            |
|                                                     |              | cM                            | 11.9                                 | 28.63                                | 29.86                                | 12.71                                |
|                                                     |              | Ratio map distance<br>P value | 1.3<br>0.0016*                       | 1.3<br>0.0030*                       | 1.3<br>0.0214                        | 1.3<br>0.0257                        |
| <i>dmc1 hed1</i><br>(non-exchange tetrads excluded) | AdjPD        | PD:NPD:TT                     | 486:3:129                            | 486:10:427                           | 487:17:392                           | 487:4:148                            |
|                                                     |              | cM                            | 11.89                                | 26.38                                | 27.57                                | 13.47                                |
|                                                     | AdjCO        | PD:NPD:TT                     | 437:1:129                            | 132:4:126                            | 152:8:118                            | 409:2:124                            |
|                                                     |              | cM                            | 11.9                                 | 28.63                                | 29.86                                | 12.71                                |
|                                                     |              | Ratio Map distance<br>P value | 1.0<br>0.4955                        | 1.1<br>0.6287                        | 1.1<br>0.5551                        | 0.9<br>0.8858                        |

This analysis demonstrates that the total data set for the *dmc1 hed1* mutant displays the signature of negative interference for coincident COs involving unlinked intervals. Removing the non-exchange chromosomes from the analysis eliminates the signature of negative interference. This result suggests that the apparent negative interference in *dmc1 hed1* results from the contribution of non-exchange tetrads to the data. Therefore, the analysis provides evidence that most or all non-exchange tetrads represent a distinct subpopulation that is not engaged in crossover control. For each reference interval, tetrads were divided into AdjCO (TTs and NPDs) and AdjPD (PDs). Distributions of tetrad types were then determined for the test interval and compared using the G test. Map distances were also calculated using the Perkins equation [101] using the Stahl laboratory online tool and expressed as a ratio ( $cM^{AdjCO}/cM^{AdjPD}$ ). A ratio of >1 and P value of  $\leq 0.006$  indicates negative interference between the two intervals based on the Bonferroni Correction for 12 measurements. The ratio of the map distances in the test interval is taken as strength of interference. All P values marked with an asterisk indicate significant differences.

**Supplemental Table 5. Continued.**  
**Analysis of coincident crossovers involving distant intervals**

|                                                     |              |                               | Reference Interval            |                               |                               |                               |
|-----------------------------------------------------|--------------|-------------------------------|-------------------------------|-------------------------------|-------------------------------|-------------------------------|
|                                                     | Tetrad Class | Test Interval:                | <i>THR4:CUP1</i>              | <i>CHA1:HIS4</i>              | <i>HIS4:LEU2</i>              | <i>CUP1:GIT1</i>              |
| WT                                                  | Adj PD       | PD:NPD:TT                     | <i>CHA1:HIS4</i><br>249:3:245 | <i>THR4:CUP1</i><br>249:8:227 | <i>CUP1:GIT1</i><br>558:3:148 | <i>HIS4:LEU2</i><br>558:4:213 |
|                                                     |              | cM                            | 26.46                         | 28.41                         | 11.71                         | 15.29                         |
|                                                     | AdjCO        | PD:NPD:TT                     | 235:3:237                     | 248:5:235                     | 217:0:50                      | 151:1:49                      |
|                                                     |              | cM                            | 26.84                         | 27.15                         | 9.36                          | 13.68                         |
|                                                     |              | Ratio map distance<br>P value | 1.0<br>0.9679                 | 1.0<br>0.5387                 | 0.8<br>0.5068                 | 0.9<br>0.654                  |
| <i>dmc1 hed1</i><br>(all tetrads included)          | Adj PD       | PD:NPD:TT                     | 542:10:297                    | 542:17:265                    | 903:1:205                     | 903:4:219                     |
|                                                     |              | cM                            | 21.02                         | 22.27                         | 9.51                          | 10.79                         |
|                                                     | AdjCO        | PD:NPD:TT                     | 282:4:254                     | 307:8:250                     | 223:3:53                      | 206:2:54                      |
|                                                     |              | cM                            | 25.47                         | 26.37                         | 12.72                         | 12.6                          |
|                                                     |              | Ratio map distance<br>P value | 1.2<br><0.001*                | 1.2<br><0.001*                | 1.3<br>0.0473                 | 1.0<br>0.4404                 |
| <i>dmc1 hed1</i><br>(non-exchange tetrads excluded) | AdjPD        | PD:NPD:TT                     | 333:10:297                    | 333:17:265                    | 694:1:205                     | 694:4:219                     |
|                                                     |              | cM                            | 27.89                         | 29.84                         | 11.72                         | 13.25                         |
|                                                     | AdjCO        | PD:NPD:TT                     | 282:4:254                     | 307:8:250                     | 223:3:53                      | 206:2:54                      |
|                                                     |              | cM                            | 25.74                         | 26.37                         | 12.72                         | 12.6                          |
|                                                     |              | Ratio Map distance<br>P value | 0.9<br>0.4678                 | 0.9<br>0.282                  | 1.1<br>0.0275                 | 1.0<br>0.3738                 |
