# Supplementary material for: Meiotic Crossover Control by Concerted Action of Rad51-Dmc1 in Homolog Template Bias and Robust Homeostatic Regulation
Source: PLOS journal article supplement (doi:10.1371/journal.pgen.1003978), 2013-12-19
Supplement: S14 (10.1371/journal.pgen.1003978.s014) [file journal.pgen.1003978.s014.pdf › journal.pgen.1003978.s014.pdf]

**Supplemental Table 6. Yeast strains used in this study (all in the SK1 strain background)**

| Strain                 | Genotype                                                                                                                                                                                                                                                                                                                      |
|------------------------|-------------------------------------------------------------------------------------------------------------------------------------------------------------------------------------------------------------------------------------------------------------------------------------------------------------------------------|
| NHY 1804               | <i>ho::hisG<sup>+</sup> leu2::hisG<sup>+</sup> ura3(ΔSma-Pst)<sup>+</sup> HIS4::LEU2-(BamHI; +ori)/his4-X::LEU2-(NgoMIV; +ori)-URA3</i>                                                                                                                                                                                       |
| NHY 3124               | <i>ho::hisG<sup>+</sup> leu2::hisG<sup>+</sup> ura3(ΔSma-Pst)<sup>+</sup> HIS4::LEU2-(BamHI; +ori)/his4-X::LEU2-(NgoMIV; +ori)-URA3<br/>hed1Δ::kanMX<sup>+</sup></i>                                                                                                                                                          |
| NHY 4096               | <i>ho::hisG<sup>+</sup> leu2::hisG<sup>+</sup> ura3(ΔSma-Pst)<sup>+</sup> HIS4::LEU2- (BamHI; + ori)/X::LEU2- (NgoMIV; + ori)-URA3<br/>dmc1Δ::kanMX4<sup>+</sup></i>                                                                                                                                                          |
| NHY 3157               | <i>ho::hisG<sup>+</sup> leu2::hisG<sup>+</sup> ura3(ΔSma-Pst)<sup>+</sup> HIS4::LEU2-(BamHI; +ori)/his4-X::LEU2-(NgoMIV; +ori)-URA3<br/>hed1Δ::kanMX<sup>+</sup> dmc1Δ::kanMX4<sup>+</sup></i>                                                                                                                                |
| NHY 2328<br>X NHY 2498 | <i>ho::hisG<sup>+</sup> ura3(ΔSma-Pst)<sup>+</sup> Δade2<sup>+</sup> thr4-B/THR4 lys2<sup>+</sup> trp1Δ/trp1Δ cup1Δ/cup1Δ TRP1--on chr3/CUP1--on chr3<br/>leu2-r/LEU2 GAL3+<sup>+</sup> CEN3::URA3/CEN3::LYS2 can1-r/CAN1 CYH1/cyh-r CHA1/cha1::ADE2 GIT1::hphMX4</i>                                                         |
| NHY 3388<br>X NHY 3390 | <i>ho::hisG<sup>+</sup> ura3(ΔSma-Pst)<sup>+</sup> Δade2<sup>+</sup> thr4-B/THR4 lys2<sup>+</sup> trp1Δ/trp1Δ cup1Δ/cup1Δ TRP1--on chr3/CUP1--on chr3<br/>leu2-r/LEU2 GAL3+<sup>+</sup> CEN3::URA3/CEN3::LYS2 can1-r/CAN1 CYH1/cyh-r CHA1/cha1::ADE2 GIT1::hphMX4<br/>hed1Δ::kanMX4<sup>+</sup></i>                           |
| NHY 4488<br>X NHY 4489 | <i>ho::hisG<sup>+</sup> ura3(ΔSma-Pst)<sup>+</sup> Δade2<sup>+</sup> thr4-B/THR4 lys2<sup>+</sup> trp1Δ/trp1Δ cup1Δ/cup1Δ TRP1--on chr3/CUP1--on chr3<br/>leu2-r/LEU2 GAL3+<sup>+</sup> CEN3::URA3/CEN3::LYS2 can1-r/CAN1 CYH1/cyh-r CHA1/cha1::ADE2 GIT1::hphMX4<br/>hed1Δ::kanMX4<sup>+</sup> dmc1Δ::kanMX4<sup>+</sup></i> |
| NHY 4042               | <i>ho::hisG<sup>+</sup> leu2::hisG<sup>+</sup> ura3(ΔSma-Pst)<sup>+</sup> HIS4::LEU2-(BamHI; +ori)/his4-X::LEU2-(NgoMIV; +ori)-URA3<br/>mnd1Δ::kanMX4<sup>+</sup></i>                                                                                                                                                         |
| NHY 4053               | <i>ho::hisG<sup>+</sup> leu2::hisG<sup>+</sup> ura3(ΔSma-Pst)<sup>+</sup> HIS4::LEU2-(BamHI; +ori)/his4-X::LEU2-(NgoMIV; +ori)-URA3<br/>mnd1Δ::kanMX4<sup>+</sup> hed1Δ::kanMX4<sup>+</sup></i>                                                                                                                               |
| NHY 4181               | <i>ho::hisG<sup>+</sup> leu2::hisG<sup>+</sup> ura3(ΔSma-Pst)<sup>+</sup> HIS4::LEU2-(BamHI; +ori)/his4-X::LEU2-(NgoMIV; +ori)-URA3<br/>hed1Δ::kanMX<sup>+</sup> dmc1Δ::kanMX4<sup>+</sup> mnd1Δ::kanMX4<sup>+</sup></i>                                                                                                      |
| NHY 1736               | <i>ho::hisG<sup>+</sup> leu2::hisG<sup>+</sup> ura3(ΔSma-Pst)<sup>+</sup> HIS4::LEU2- (BamHI; + ori)/his4-X::LEU2- (NgoMIV; + ori)-URA3<br/>Δrad51::hisG<sup>+</sup></i>                                                                                                                                                      |
| NHY 3559               | <i>ho::hisG<sup>+</sup> leu2::hisG<sup>+</sup> ura3(ΔSma-Pst)<sup>+</sup> HIS4::LEU2-(BamHI; +ori)/his4-X::LEU2-(NgoMIV; +ori)-URA3<br/>hed1Δ::kanMX<sup>+</sup> Δrad51::hisG<sup>+</sup></i>                                                                                                                                 |
| NHY 3520               | <i>ho::hisG<sup>+</sup> leu2::hisG<sup>+</sup> ura3(ΔSma-Pst)<sup>+</sup> HIS4::LEU2-(BamHI; +ori)/his4-X::LEU2-(NgoMIV; +ori)-URA3<br/>dmc1Δ::kanMX4<sup>+</sup> Δrad51::hisG<sup>+</sup></i>                                                                                                                                |
| NHY 3519               | <i>ho::hisG<sup>+</sup> leu2::hisG<sup>+</sup> ura3(ΔSma-Pst)<sup>+</sup> HIS4::LEU2-(BamHI; +ori)/his4-X::LEU2-(NgoMIV; +ori)-URA3<br/>hed1Δ::kanMX<sup>+</sup> dmc1Δ::kanMX4<sup>+</sup> Δrad51::hisG<sup>+</sup></i>                                                                                                       |
| NHY 3944               | <i>ho::hisG<sup>+</sup> leu2::hisG<sup>+</sup> ura3(ΔSma-Pst)<sup>+</sup> HIS4::LEU2-(BamHI; +ori)/his4-X::LEU2-(NgoMIV; +ori)-URA3<br/>mei5Δ::kanMX4<sup>+</sup></i>                                                                                                                                                         |
| NHY 4031               | <i>ho::hisG<sup>+</sup> leu2::hisG<sup>+</sup> ura3(ΔSma-Pst)<sup>+</sup> HIS4::LEU2-(BamHI; +ori)/his4-X::LEU2-(NgoMIV; +ori)-URA3<br/>mei5Δ::kanMX4<sup>+</sup> hed1Δ::kanMX4<sup>+</sup></i>                                                                                                                               |
| NHY 4763               | <i>hoΔ<sup>+</sup> leu2<sup>+</sup> ura3<sup>+</sup> ERG1-(Sal1)/ERG1-(SpeI), HIS4::LEU2-(BamHI; +ori)/his4-X::LEU2-(NgoMIV; +ori)-URA</i>                                                                                                                                                                                    |
| NHY 4765               | <i>hoΔ<sup>+</sup> leu2<sup>+</sup> ura3<sup>+</sup> ERG1-(Sal1)/ERG1-(SpeI), HIS4::LEU2-(BamHI; +ori)/his4-X::LEU2-(NgoMIV; +ori)-URA<br/>dmc1Δ::KanMX4<sup>+</sup> hed1Δ::KanMX4</i>                                                                                                                                        |
| DKB 1772               | <i>ho::hisG<sup>+</sup>, HIS4::LEU2-(NBam)/his4X::LEU2-(NBam)-URA3, leu2::hisG<sup>+</sup>, ura3 (ΔPst-Sma)<sup>+</sup></i>                                                                                                                                                                                                   |
| DKB 2904               | <i>ho::hisG<sup>+</sup>, lys2<sup>+</sup>, leu2::hisG<sup>+</sup>, dmc1Δ::ARG4<sup>+</sup>, HIS4::LEU2-(NBam)/his4X::LEU2-(NBam)-URA3, ura3/ura3 or URA,<br/>ARG4<sup>+</sup></i>                                                                                                                                             |
| DKB 2905               | <i>ho::hisG<sup>+</sup>, lys2<sup>+</sup>, leu2::hisG<sup>+</sup>, HIS4::LEU2-(NBam)/his4X::LEU2-(NBam)-URA3, ura3<sup>+</sup>, ARG4<sup>+</sup>, trp<sup>+</sup>,<br/>hed1::KanMX4<sup>+</sup></i>                                                                                                                           |
| DKB 2908               | <i>ho::hisG<sup>+</sup>, lys2<sup>+</sup>, leu2::hisG<sup>+</sup>, dmc1Δ::ARG4<sup>+</sup>, HIS4::LEU2-(NBam)/his4X::LEU2-(NBam)-URA3, ura3<sup>+</sup>, ARG4<sup>+</sup>,<br/>hed1::KanMX4<sup>+</sup>, trp<sup>+</sup></i>                                                                                                  |
| DKB 3348               | <i>ho::hisG<sup>+</sup>, HIS4::LEU2-(NBam)/his4X::LEU2-(NBam)-URA3, leu2::hisG<sup>+</sup>, ura3(ΔPst-Sma)<sup>+</sup>, mek1-as1<sup>+</sup>,<br/>hed1::KanMX4<sup>+</sup>, trp<sup>+</sup></i>                                                                                                                               |
| DKB 3343               | <i>ho::hisG<sup>+</sup>, leu2::hisG<sup>+</sup>, HIS4::LEU2-(NBam)/his4x::LEU2-(NBam)-URA3, ura3(ΔPst-Sma)<sup>+</sup>, mek1-as1<sup>+</sup>, lys2/LYS2</i>                                                                                                                                                                   |
| DKB 3497               | <i>ho::hisG<sup>+</sup>, his4X::LEU2-(NgoMIV+ori)-URA3/HIS4::LEU2-(BamHI; +ori), leu2::hisG<sup>+</sup>, ura3 (ΔPst-Sma)<sup>+</sup>,<br/>mek1Δ::NAT<sup>+</sup></i>                                                                                                                                                          |
| DKB 3512               | <i>ho::hisG<sup>+</sup>, his4X::LEU2-(NgoMIV+ ori)-URA3/HIS4X::LEU2-(BamHI; +ori)-ura3, leu2::hisG<sup>+</sup>, ura3 (ΔPst-Sma) <sup>+</sup>,<br/>mek1Δ::NAT<sup>+</sup>, hed1::KANMX4</i>                                                                                                                                    |
| DKB 3048               | <i>ho::hisG<sup>+</sup>, lys2<sup>+</sup>, ura3<sup>+</sup>, leu2::hisG<sup>+</sup>, his4X::LEU2-(NBam)-URA3/HIS4::LEU2-(NBam), rad51Δ::hisG<sup>+</sup>, arg-nsp<sup>+</sup></i>                                                                                                                                             |
| DKB 3050               | <i>ho::hisG/ho::LYS2, lys2<sup>+</sup>, ura3<sup>+</sup>, leu2::hisG<sup>+</sup>, his4X::LEU2-(NBam)-URA3/HIS4::LEU2-(NBam), trp<sup>+</sup>,<br/>hed1::KanMX4<sup>+</sup>, rad51Δ::hisG<sup>+</sup>, arg-nsp<sup>+</sup></i>                                                                                                 |
